# Supplementary material for: Genomic sketching with multiplicities and locality-sensitive hashing using Dashing 2
Source: PubMed Central journal article supplement (PMC10538361; doi:10.1101/gr.277655.123), 2023-07
Supplement: Supplemental_Materials.pdf [file Supplemental_Materials.pdf]

# Supplementary Material for “Genomic sketching with multiplicities and locality-sensitive hashing using Dashing 2”

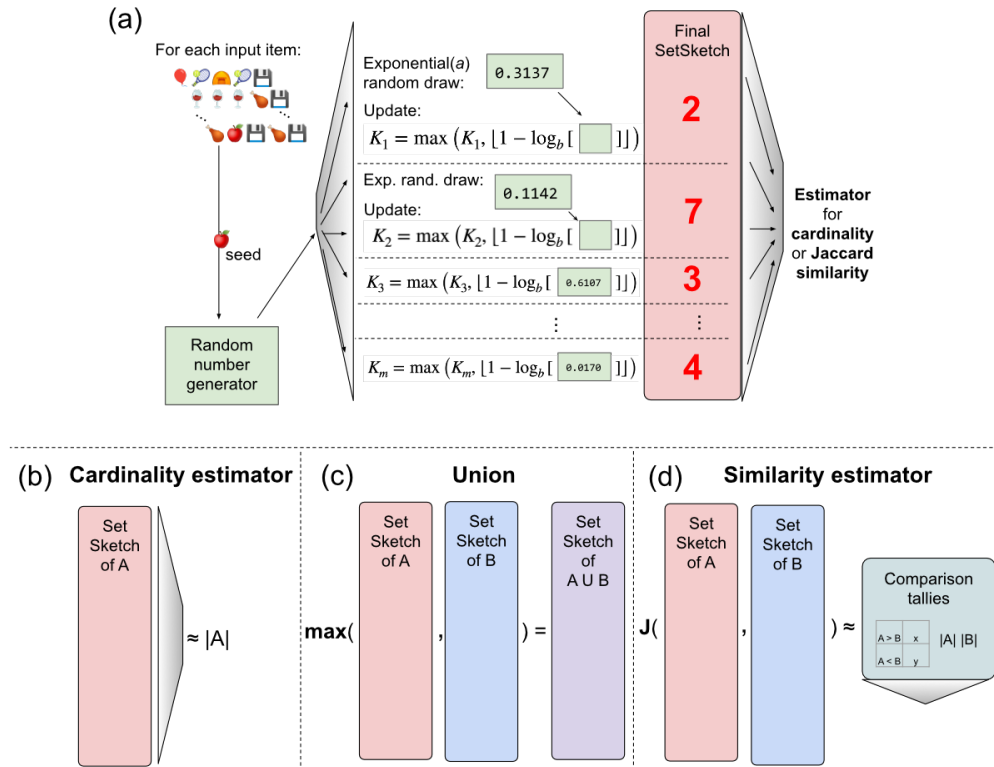

Figure S1: (a) Schematic of SetSketch. A given input item is hashed and its hash value is used to seed the pseudo-random number generator (RNG). The RNG generates exponential random draws for each register. Each register is updated according to the given rule. Once fully populated, the register values are used in combination with different estimators for set cardinality or Jaccard similarity. (b) Illustration of estimating cardinality of set A via its SetSketch. (c) Illustration of combining two SetSketches to obtain the sketch of the union. (d) Illustration of using Jaccard similarity estimator to compare two datasets via their SetSketches.

**Input:**  $K[0..m - 1]$ : SetSketch registers for this dataset  
**Input:**  $id$ : Identifier for this dataset  
**Input:**  $RNG$ : Pseudo-random number generator  
**Input:**  $seed$ : Pseudo-random seed  
**Input:**  $N$ : Number of super-register sizes in index  
**Input:**  $LSH$ : map from  $\langle \text{table id, super-register id, super-register value} \rangle$  triples to a corresponding list of datasets  
**Result:**  $LSH$  updated to include dataset  $\langle K, id \rangle$

```

1  $i \leftarrow N - 1$ 
2 if  $i > 2$  then
3   |  $RNG.initialize(seed)$ 
   end
   // Loop over tables 0 ..  $N-1$ , from largest super-register size (most specific)
   // to smallest (least specific)
4 while  $i \geq 0$  do
5   |  $P \leftarrow \min(2^i, 2i)$ 
6   | if  $i \leq 2$  then
7     |  $S \leftarrow m/N$ 
8   | else
9     |  $S \leftarrow m \cdot 8/N$ 
10  | end
11  |  $j \leftarrow 0$  // Loop over super-registers
12  | while  $j < S$  do
13    | if  $i \leq 2$  then
14      | // Next non-overlapping super-register
15      |  $SuperReg \leftarrow K[P \cdot j .. P \cdot j + P - 1]$ 
16    | else
17      | // Get uniform random integer in  $[0, m - P]$ 
18      |  $ri \leftarrow RNG.randomInt(0, m - P)$ 
19      |  $SuperReg \leftarrow K[ri .. ri + P - 1]$ 
20    | end
21    | // Append this dataset to the list for this table, super-register
22    | // super-register value combination
23    |  $LSH[\langle i, j, SuperReg \rangle].append(id)$ 
24    |  $j \leftarrow j + 1$ 
25  | end
26  |  $i \leftarrow i - 1$ 
27 end

```

**Algorithm S1:** Add dataset  $\langle K, id \rangle$  to LSH index

**Input:** SetSketch  $K[0..m-1]$ , item  $X$

**Result:**  $K$  updated according to  $X$

- 1  $RI \leftarrow \text{hash}(X)$
- 2  $q \leftarrow RI \bmod m$
- 3  $p \leftarrow \lfloor RI/m \rfloor$
- 4  $K[i] \leftarrow \min(K[i], p)$

**Algorithm S2:** Update one-permutation Dashing 2 SetSketch. Each  $K_i$  gets the minimal 64-bit random draw among draws that map there.

**Input :** SetSketch  $K[0..m-1]$ , item  $X$

**Output:**  $K'$  set to a truncated form of  $K$

- 1 **for**  $i \leftarrow 0, m-1$  **do**
- 2 |  $K'[i] \leftarrow \lfloor 1 - \log_b(K[i]) \rfloor$
- end**

**Algorithm S3:** Finalize Full Dashing 2 SetSketch

**Input :** Temporary  $K[0..m-1]$  from Algorithm S2

**Output:** Finalized  $K'$

- 1 **for**  $i \leftarrow 0, m-1$  **do**
- 2 |  $RV \leftarrow -\ln(K[i])$
- 3 |  $K'[i] \leftarrow \lfloor 1 - \log_b(RV) \rfloor$
- end**

**Algorithm S4:** Finalize one-permutation Dashing 2 SetSketch

| Method   | Time (seconds) |            | Memory footprint (MB) |            |
|----------|----------------|------------|-----------------------|------------|
|          | Sketching      | Similarity | Sketching             | Similarity |
| Mash     | 16.1           | 4.61       | 338                   | 41.4       |
| Sourmash | 89.4           | 11.9       | 141                   | 320        |
| BinDash  | 26.8           | 28.2       | 37.8                  | 124        |
| D2       | 10.2           | 0.12       | 169                   | 39.9       |
| D2-full  | 16.3           | 0.13       | 169                   | 40.2       |
| D2W      | 47.0           | 0.13       | 481                   | 51.7       |

Table S1: Running time (i.e. wall-clock time) and memory footprint (i.e. peak resident set size) of each sketching tool as measured by `/usr/bin/time -v`. The “Sketching” task involved sketching all 2,020 genome assemblies used in the experiments over 1,010 genome pairs described in Results. The “Similarity” task involved computing all pairwise Jaccard similarities between the sketches produced by the first task. All tools were run with 16 threads. In the case of Sourmash’s sketching mode, we used GNU parallel to keep a steady state of 16 simultaneous sketching processes. Smallest and second-smallest values highlighted in red and dark red respectively. Software versions used were Mash v2.3, Sourmash v4.6.1, BinDash v1.0, and Dashing 2 v2.1.6
