# Supplementary figures and images for: Genomic sketching with multiplicities and locality-sensitive hashing using Dashing 2
Source: HighWire-hosted journal article supplement (doi:10.1101/gr.277655.123), 2023-07-06

Sketch size = 16384 bits

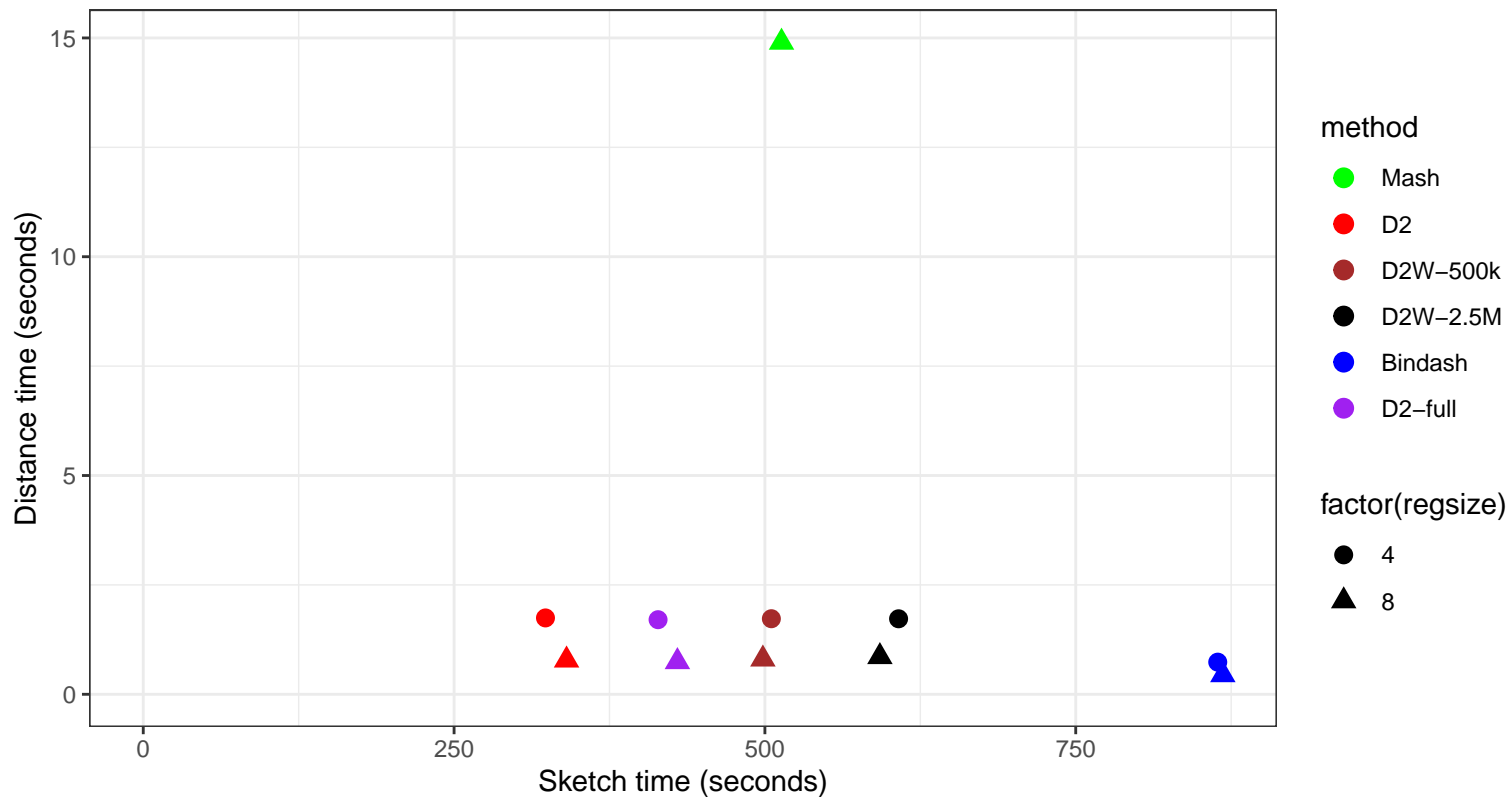

Supplement: Supplemental_Scripts_for_experiments.zip [file bigmem_k31_sz16384.pdf › dashing2-experiments-release/allpairs/exhaustive/bigmem_k31_sz16384.pdf]

Sketch size = 32768 bits

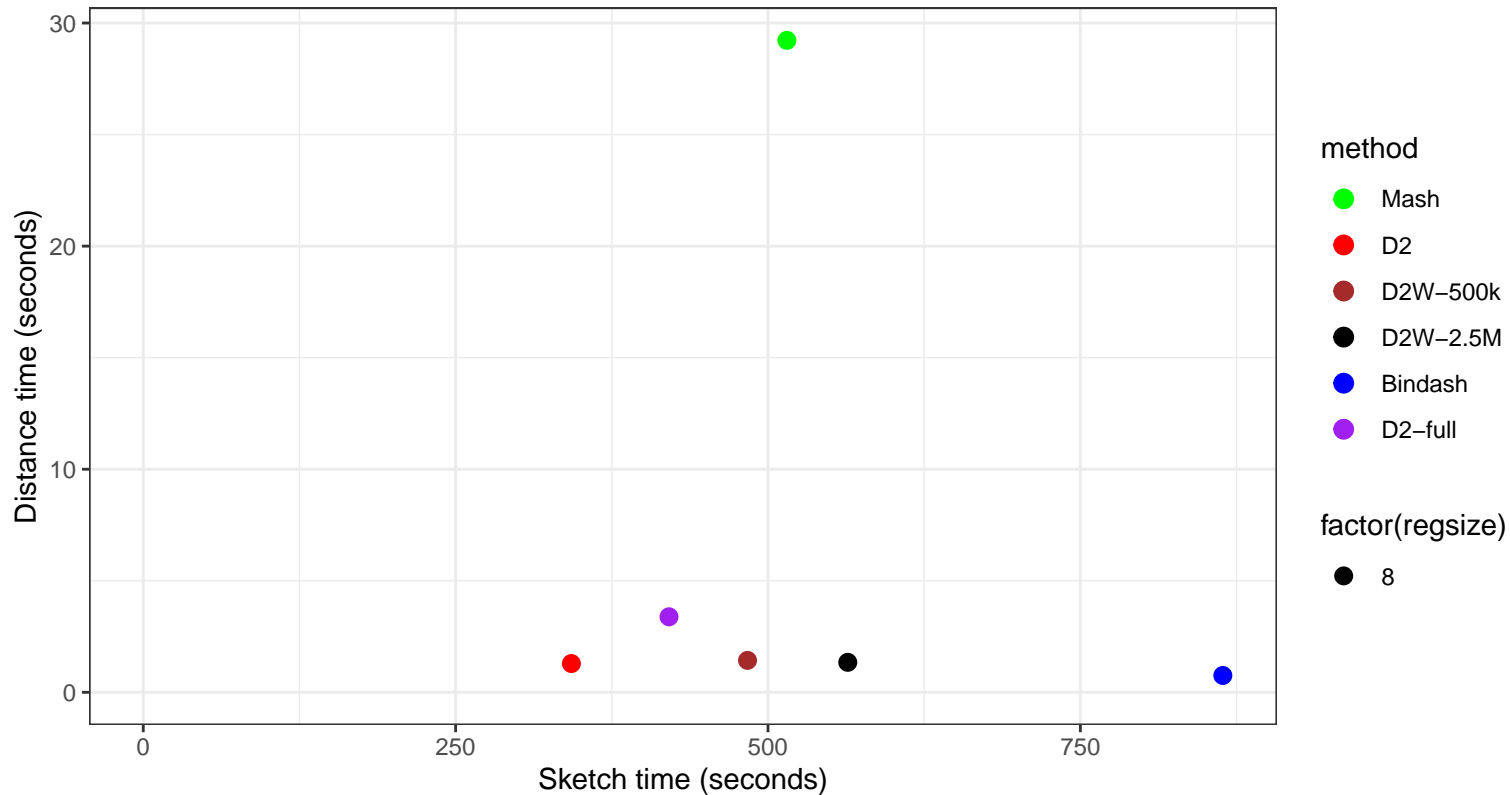

Supplement: Supplemental_Scripts_for_experiments.zip [file bigmem_k31_sz32768.pdf › dashing2-experiments-release/allpairs/exhaustive/bigmem_k31_sz32768.pdf]

Sketch size = 8192 bits

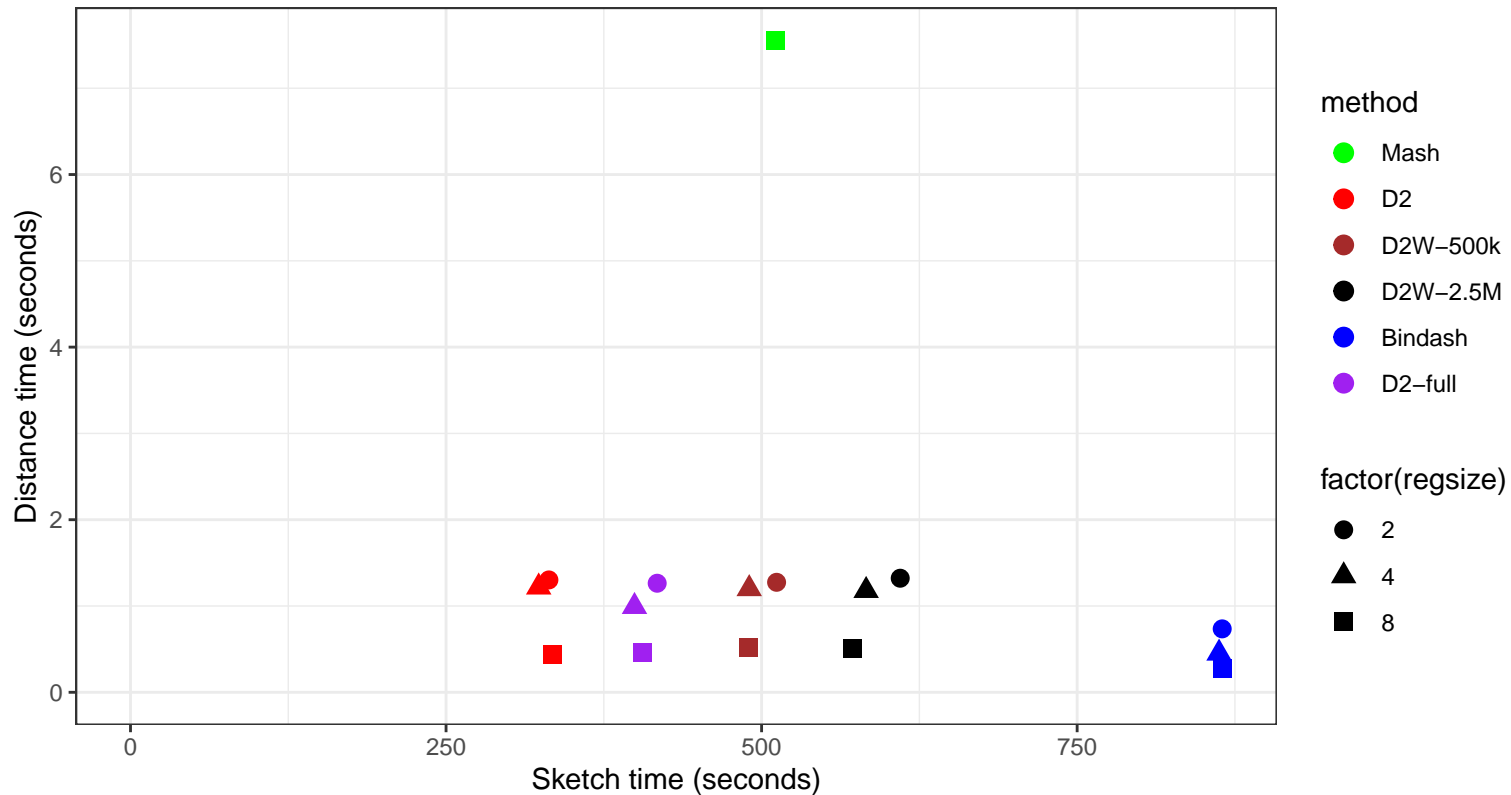

Supplement: Supplemental_Scripts_for_experiments.zip [file bigmem_k31_sz8192.pdf › dashing2-experiments-release/allpairs/exhaustive/bigmem_k31_sz8192.pdf]
